# Supplementary material for: Pretreatment Lymphocyte Monocyte Ratio Predicts Long-Term Outcomes in Patients with Digestive System Tumor: A Meta-Analysis
Source: Hindawi journal article supplement (doi:10.1155/2016/9801063), 2016-01-01
Supplement: f1 [file 9801063.f1.pdf]

## Supplementary material

Example of search criteria in “PubMed”:

```
((("Neoplasms"[Mesh]) OR ((((((neoplasm[Title/Abstract]) OR cancer[Title/Abstract]) OR carcinoma[Title/Abstract]) OR tumor[Title/Abstract]) OR adenocarcinoma[Title/Abstract]) OR oncology[Title/Abstract]) OR malignant[Title/Abstract]))) AND (((((LMR[Title/Abstract]) OR lymphocyte monocyte ratio[Title/Abstract]) OR lymphocyte-monocyte ratio[Title/Abstract]) OR lymphocyte/monocyte ratio[Title/Abstract]) OR lymphocyte to monocyte ratio[Title/Abstract])
```



## Supplementary Table S1

**Table S1.** Newcastle-Ottawa scale used for methodological quality assessment of Cohort Study

---

### Check List

---

#### Selection

(1) Representativeness of the exposed cohort

- (a) Truly representative of the average 'digestive system cancer patients' in the community (1 star)
- (b) Somewhat representative of the average 'digestive system cancer patients' in the community (1 star)
- (c) Selected group of users (e.g. nurses, volunteers)
- (d) No description of the derivation of the cohort

(2) Selection of the non-exposed cohort

- (a) Drawn from the same community as the exposed cohort (1 star)
- (b) Drawn from a different source
- (c) No description of the derivation of the non-exposed cohort

(3) Ascertainment of exposure (Proof of digestive system cancer and LMR measurement)

- (a) Secure record (eg. Surgical records) (1 star)
- (b) Structured interview (1 star)
- (c) Written self-report
- (d) No description

(4) Demonstration that outcome of interest was not present at start of study

- (a) Yes (1 star)
- (b) No

#### Comparability

(1) Comparability of cohorts on the basis of the design or analysis

- (a) Study controls for '1, 2, 3' (one star was assigned if more than 1 of these 3 characteristics were reported; 0 star was assigned if none of these 3 characteristics was reported)
- (b) Study controls for '4, 5, 6, 7, 8, 9' (one star was assigned if more than 1 of these 6 characteristics was reported; 0 star was assigned if none of these 6 characteristics was reported)

---

Underlined and quoted phrases are provided in the scale to allow for adjustment to particular studies.

Comparability variables: 1, Infection; 2, Immune system disorders; 3, Anti-inflammation drugs taken; 4, Age; 5, Gender; 6, Tumor Stage; 7, Metastasis; 8, Tumor grade; 9, Other

**Table S1.** Newcastle-Ottawa scale used for methodological quality assessment of Cohort Study (continued)

---

**Check List**

---

**Outcome**

(1) Assessment of outcome (Death or recurrence)

- (a) Independent blind assessment (1 star)
- (b) Record linkage (1 star)
- (c) Self-report
- (d) No description

(2) Was follow-up long enough for outcomes to occur? (Death or recurrence)

- (a) Yes ('2-5 years') (1 star)
- (b) No

(3) Adequacy of follow-up of cohorts

- (a) Complete follow-up: all subjects accounted for (1 star)
  - (b) Subjects lost to follow-up unlikely to introduce bias: small number lost '25%' or description provided of those lost (1 star)
  - (c) Follow-up rate '75%' and no description of those lost
  - (d) No statement
-



## Supplementary Results

**Table S2.** Assessment of Quality of Studies

| Author             | Year | Selection |   |   |   | Comparability | Outcome assessment |   |   | Score |
|--------------------|------|-----------|---|---|---|---------------|--------------------|---|---|-------|
|                    |      | 1         | 2 | 3 | 4 | 5             | 6                  | 7 | 8 |       |
| Chan               | 2016 | *         | * | * | * | *             | *                  | * | * | ***** |
| Facciorusso        | 2016 | *         | * | * | * | *             | *                  | * | * | ***** |
| Hsu                | 2016 | *         | * | * | * | *             | *                  | * | - | ***** |
| Li <sup>1</sup>    | 2016 | *         | * | * | * | **            | *                  | * | * | ***** |
| Li <sup>2</sup>    | 2016 | *         | * | * | * | **            | *                  | * | * | ***** |
| Wu                 | 2016 | *         | * | * | * | **            | *                  | * | * | ***** |
| Deng               | 2015 | *         | * | * | * | **            | *                  | * | * | ***** |
| Han                | 2015 | *         | * | * | * | **            | *                  | * | * | ***** |
| Huang              | 2015 | *         | * | * | * | *             | *                  | * | - | ***** |
| Kozak              | 2015 | *         | * | * | * | -             | *                  | * | * | ***** |
| Lin                | 2015 | *         | * | * | * | **            | *                  | * | * | ***** |
| Liu                | 2015 | *         | * | * | * | **            | *                  | * | - | ***** |
| Neal               | 2015 | *         | * | * | * | -             | *                  | * | * | ***** |
| Neofytou           | 2015 | *         | * | * | * | *             | *                  | * | * | ***** |
| Ozawa              | 2015 | *         | * | * | * | *             | *                  | * | - | ***** |
| Qi                 | 2015 | *         | * | * | * | *             | *                  | * | - | ***** |
| Shibutani          | 2015 | *         | * | * | * | *             | *                  | * | * | ***** |
| Song               | 2015 | *         | * | * | * | *             | *                  | * | - | ***** |
| Xiao               | 2015 | *         | * | * | * | *             | *                  | * | * | ***** |
| Stotz <sup>1</sup> | 2014 | *         | * | * | * | *             | *                  | * | * | ***** |
| Stotz <sup>2</sup> | 2014 | *         | * | * | * | *             | *                  | * | * | ***** |
| Zhou               | 2014 | *         | * | * | * | **            | *                  | * | * | ***** |

-: zero point, \*: One point, \*\*: Two points

**Table S3.** Detailed Characteristics of included studies

| Study           | Year | No.  | Country   | Male (%)    | Age                | Site       | Therapy   | Stage | Follow up          | Cut-off | Beyond cut-off (%) | Outcome     | MVA | Method to get UVA HR |
|-----------------|------|------|-----------|-------------|--------------------|------------|-----------|-------|--------------------|---------|--------------------|-------------|-----|----------------------|
| Chan            | 2016 | 1623 | Australia | 801 (49.4)  | NA                 | Colorectal | with-Surg | NMS   | 52.0 <sup>md</sup> | 2.38    | 797 (49.1)         | OS          | YES | Reported             |
| Facciorusso     | 2016 | 127  | Italy     | 83 (69.2)   | 66.0 <sup>md</sup> | Colorectal | no-Surg   | MS    | 60.0 <sup>md</sup> | 3.96    | 70 (55.1)          | OS, RFS     | YES | Reported             |
| Hsu             | 2016 | 926  | China     | 583 (63.0)  | NA                 | Stomach    | with-Surg | Mixed | 32.0 <sup>md</sup> | 4.8     | 416 (44.9)         | OS          | YES | Estimated            |
| Li <sup>1</sup> | 2016 | 144  | China     | 77 (53.5)   | 62 <sup>me</sup>   | Pancreas   | with-Surg | NMS   | 14 <sup>md</sup>   | 2.8     | 68 (47.2)          | OS, RFS     | YES | Estimated            |
| Li <sup>2</sup> | 2016 | 5336 | China     | 3167 (59.4) | 59 <sup>md</sup>   | Colorectal | with-Surg | NMS   | 55.2 <sup>md</sup> | 2.83    | 3988 (74.7)        | OS, DFS     | YES | Reported             |
| Wu              | 2016 | 450  | China     | 391 (86.9)  | 49.6 <sup>me</sup> | Liver      | with-Surg | MS    | 45.5 <sup>md</sup> | 3.77    | 269 (59.8)         | OS, RFS     | YES | Reported             |
| Deng            | 2015 | 389  | China     | 282 (72.5)  | 65.0 <sup>md</sup> | Stomach    | with-Surg | Mixed | 24.0 <sup>md</sup> | 4.95    | 148 (38.0)         | OS,CSS,DFS  | YES | Estimated            |
| Han             | 2015 | 218  | China     | 177 (81.2)  | 60.5 <sup>md</sup> | Esophagus  | with-Surg | NMS   | 38.6 <sup>md</sup> | 2.57    | 173 (79.4)         | OS, DFS     | YES | Reported             |
| Huang           | 2015 | 348  | China     | 303 (87.1)  | 59.2 <sup>me</sup> | Esophagus  | with-Surg | NMS   | NA                 | 2.93    | 145 (41.7)         | CSS         | YES | Reported             |
| Kozak           | 2015 | 129  | USA       | 55 (42.6)   | 67.0 <sup>md</sup> | Colorectal | with-Surg | NMS   | 24.7 <sup>md</sup> | 2.6     | 64 (49.6)          | OS, DFS     | YES | Estimated            |
| Lin             | 2015 | 210  | China     | 185 (88.1)  | NA                 | Liver      | with-Surg | NMS   | 34.8 <sup>md</sup> | 3.23    | 144 (68.6)         | OS, RFS     | YES | Reported             |
| Liu             | 2015 | 326  | China     | 283 (86.8)  | 59.2 <sup>me</sup> | Esophagus  | with-Surg | NMS   | 49 <sup>md</sup>   | 2.30    | 158 (48.5)         | OS          | YES | Reported             |
| Neal            | 2015 | 302  | UK        | 192 (63.6)  | 66.0 <sup>md</sup> | Colorectal | with-Surg | MS    | 29.7 <sup>md</sup> | 2.35    | 219 (72.5)         | OS, CSS     | NO  | Reported             |
| Neofytou        | 2015 | 140  | UK        | 88 (62.9)   | NA                 | Colorectal | with-Surg | MS    | 33.0 <sup>md</sup> | 3.0     | 65 (46.4)          | OS,CSS, DFS | YES | Reported             |
| Ozawa           | 2015 | 117  | Japan     | 69 (58.9)   | 62 <sup>me</sup>   | Colorectal | with-Surg | MS    | 39.0 <sup>md</sup> | 3.0     | 79 (68.0)          | CSS, DFS    | YES | Reported             |

Abbreviation: <sup>md</sup> Median; <sup>me</sup> Mean; Surg, surgery; NMS, non-metastatic stage; MS, metastatic stage; NA, not available; OS, overall survival; DFS, disease-free survival; RFS, recurrence-free survival; CSS, cancer-specific survival; MVA, multivariate analysis; UVA, univariate analysis; HR, hazard ratio

**Table S3.** Detailed Characteristics of included studies (continued)

| Study              | Year | No. | Country | Male (%)   | Age                | Site       | Therapy   | Stage | Follow up          | Cut-off | Beyond cut-off (%) | Outcome | MVA | Method to get UVA HR |
|--------------------|------|-----|---------|------------|--------------------|------------|-----------|-------|--------------------|---------|--------------------|---------|-----|----------------------|
| Qi                 | 2015 | 211 | China   | 134 (63.5) | 61.2 <sup>me</sup> | Pancreas   | no-Surg   | Mixed | NA                 | 3.3     | 109 (51.7)         | OS      | YES | Estimated            |
| Shibutani          | 2015 | 104 | Japan   | 59 (56.7)  | 64.0 <sup>md</sup> | Colorectal | no-Surg   | MS    | 22.4 <sup>md</sup> | 3.38    | 66 (63.5)          | OS      | YES | Reported             |
| Song               | 2015 | 177 | Korea   | 83 (46.9)  | 52.0 <sup>md</sup> | Colorectal | no-Surg   | MS    | 3.1 <sup>md</sup>  | 3.4     | 64 (36.1)          | OS      | YES | Estimated            |
| Xiao               | 2015 | 280 | China   | 175 (62.5) | NA                 | Rectum     | with-Surg | NMS   | 52.0 <sup>md</sup> | 3.78    | 140 (50.0)         | DFS     | YES | Reported             |
| Stotz <sup>1</sup> | 2014 | 372 | Austria | 217 (58.3) | 64.0 <sup>md</sup> | Colon      | with-Surg | NMS   | 68.0 <sup>md</sup> | 2.83    | 105 (28.2)         | OS, RFS | YES | Reported             |
| Stotz <sup>2</sup> | 2014 | 474 | Austria | 256 (54.0) | 64.6 <sup>me</sup> | Pancreas   | with-Surg | Mixed | 36.0 <sup>md</sup> | 2.8     | 201 (42.4)         | CSS     | YES | Reported             |
| Zhou               | 2014 | 426 | China   | 304 (71.4) | NA                 | Stomach    | with-Surg | NMS   | 39.6 <sup>md</sup> | 4.32    | 242 (56.8)         | OS, RFS | YES | Reported             |

Abbreviation: <sup>md</sup> Median; <sup>me</sup> Mean; Surg, surgery; NMS, non-metastatic stage; MS, metastatic stage; NA, not available; OS, overall survival; DFS, disease-free survival; RFS, recurrence-free survival; CSS, cancer-specific survival; MVA, multivariate analysis; UVA, univariate analysis; HR, hazard ratio.
